# Supplementary material for: A fluorescent probe for the biological signaling molecule H2S based on a specific H2S trap group
Source: Royal Society of Chemistry journal article supplement (doi:10.1039/c3cc46932h), 2013-01-01
Supplement: c3cc46932h.pdf [file c3cc46932h.pdf]

## Supporting Information

### Fluorescent Probe for Biological Signaling Molecule H<sub>2</sub>S Based on a Specific H<sub>2</sub>S Trap Group

Jingyu Zhang,<sup>a</sup> Yuan-Qiang Sun,<sup>a</sup> Jing Liu,<sup>a</sup> Yawei Shi<sup>b</sup> and Wei Guo\*<sup>a</sup>

<sup>a</sup> School of Chemistry and Chemical Engineering, Shanxi University, Taiyuan 030006, China.

<sup>b</sup> Institute of Biotechnology, Shanxi University, Taiyuan 030006, China.

E-mail: [guow@sxu.edu.cn](mailto:guow@sxu.edu.cn)

**1. General information and methods.** All reagents and solvents were purchased from commercial suppliers and used without further purification unless otherwise stated. Deionized water was used throughout all experiments. All reactions were magnetically stirred and monitored by thin layer chromatography (TLC). Column chromatography was conducted over silica gel (mesh 200–300). Fluorescence spectra were taken on Varian Cary Eclipse fluorescence spectrometer with the excitation and emission slit widths at 5.0 and 5.0 nm respectively. The <sup>1</sup>H NMR and <sup>13</sup>C NMR spectra were recorded at 600 and 150 MHz, respectively. High resolution mass spectra were obtained on a Varian QFT-ESI mass spectrometer.

#### 2. Synthesis and Characterization of Compounds

##### 2.1 2-iodomethylbenzoic acid

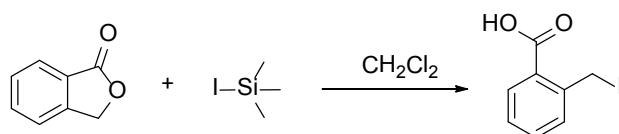

A solution of phthalide (1.34 g, 10 mmol) and iodotrimethylsilane (3.00 g, 15 mmol) in CH<sub>2</sub>Cl<sub>2</sub> (15 mL) was refluxed for 3 h, cooled to room temperature, quenched with water (10 mL) and the precipitate was filtered off, washed with water to give a white solid (2.4 g, 90 %). The crude product was used directly without further purification.

## 2.2 Synthesis of Compound 2

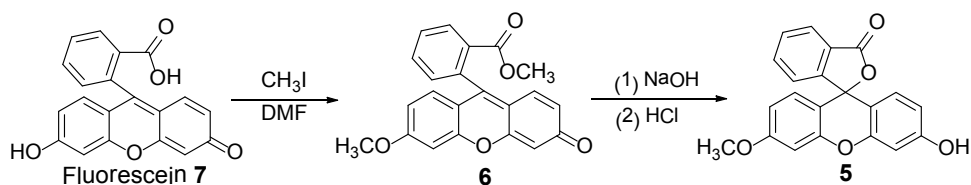

CH<sub>3</sub>I (2.84 g, 20 mmol) was added to the mixture of fluorescein **7** (3.32 g, 10 mmol) and K<sub>2</sub>CO<sub>3</sub> (2.77 g, 20 mmol) in DMF (10 mL) at room temperature. After stirring for 24 hours, the reaction mixture was diluted with H<sub>2</sub>O (150 mL), the resulting precipitate was filtered, washed with water, the filtrate was extracted with ethyl acetate, the organic phase was dried over anhydrous Na<sub>2</sub>SO<sub>4</sub> and concentrated under reduced pressure. The combined residue was subjected to silica gel chromatography with CH<sub>2</sub>Cl<sub>2</sub>/CH<sub>3</sub>OH (50:1) to give a yellow solid **6** (91 %).

10% aqueous solution of NaOH (10 mL, 25 mmol) was added to the solution of **3** (3.60 g, 10 mmol) in CH<sub>3</sub>OH (36 mL) at 30 °C. After stirring for 5 hours, CH<sub>3</sub>OH was evaporated and the reaction mixture was diluted with H<sub>2</sub>O (100 mL). The solution was acidified to pH 5 with 1 M HCl, the resulting precipitate was filtered, washed with water and dried under vacuum to give a pale yellow solid **5** (69 %) which was used for next synthesis without further purification.

## 2.3 Synthesis of probe 1

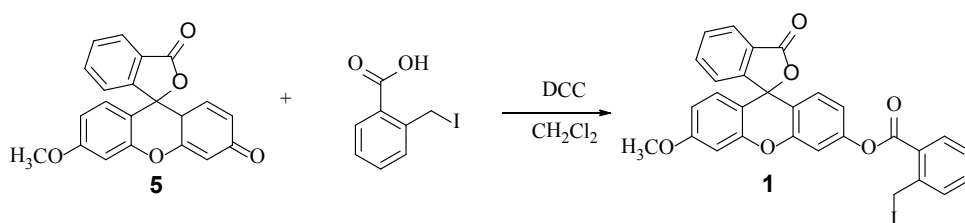

To a solution of DCC (0.206 g, 1 mmol) in CH<sub>2</sub>Cl<sub>2</sub> (10 mL) cooled at 0 °C was added 2-iodomethylbenzoic acid (0.262 g, 1 mmol) followed by DMAP (0.012 g, 0.1 mmol) and **5** (0.346 g, 1 mmol). The mixture was stirred at room temperature for 24 hours and then filtered, washed with CH<sub>2</sub>Cl<sub>2</sub>. The filtrate was concentrated to afford the crude product, then purified by silica gel column chromatography (PE : CH<sub>2</sub>Cl<sub>2</sub> = 1 : 1) to afford a white solid **1** (0.24 g, 40 %). <sup>1</sup>H NMR (CDCl<sub>3</sub>, 600 MHz) δ (ppm) : 8.18 (d, *J* = 7.8 Hz, 1H), 8.04 (d, *J* = 7.2 Hz, 1H), 7.69 (t, *J* = 7.2 Hz, 1H), 7.64 (t, *J* =

7.2 Hz, 1H), 7.54 (t,  $J = 7.2$  Hz, 1H), 7.49 (d,  $J = 7.8$  Hz, 1H), 7.42 (t,  $J = 7.8$  Hz, 1H), 7.26 (t,  $J = 5.4$  Hz, 1H), 7.20 (d,  $J = 7.8$  Hz, 1H), 6.97 (m, 1H), 6.88 (d,  $J = 9.0$  Hz, 1H), 6.80 (s, 1H), 6.77 (d,  $J = 8.8$  Hz, 1H), 6.68 (m, 1H), 4.96 (s, 2H), 3.85 (s, 3H).  $^{13}\text{C}$  NMR ( $\text{CDCl}_3$ , 150 MHz)  $\delta$  (ppm): 172.1, 167.4, 164.4, 156.0, 155.2, 154.9, 154.8, 145.2, 137.9, 136.4, 134.9, 134.4, 132.7, 132.0, 131.8, 131.1, 130.0, 129.4, 128.0, 126.9, 120.5, 120.0, 114.9, 113.9, 113.5, 103.8, 85.2, 58.4, 6.1. Anal. Calcd for  $\text{C}_{29}\text{H}_{19}\text{IO}_6$ : C, 59.00; H, 3.24. Found C, 59.12; H, 3.33. HRMS: calcd for  $[\text{M}+\text{H}]^+$  591.0299, found 591.0306.

### 2.5 Synthesis of compound 4

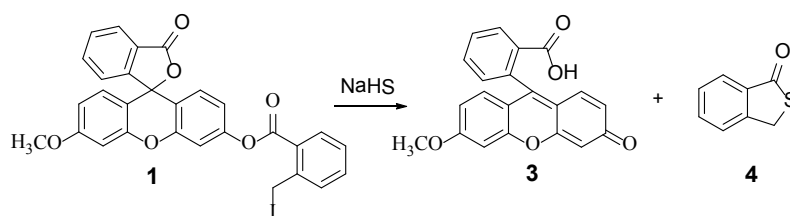

To a solution of **1** (0.118 g, 0.2 mmol) in  $\text{CH}_3\text{CN}$  (5 mL) and PBS buffer (5 mL, 20 mM, pH = 7.4) was added NaHS (0.112 g, 2 mmol), the reaction mixture was stirred for 1 h at room temperature. The color of solution turned to yellow.  $\text{CH}_3\text{CN}$  was evaporated under reduced pressure and water (25 mL) was added to the resulting residue, extracted with ethyl acetate, dried over anhydrous  $\text{Na}_2\text{SO}_4$ , evaporated under reduced pressure to give the crude product, which was purified by column chromatography ( $\text{CH}_2\text{Cl}_2$  : PE = 1 : 3) to afford compound **4** as a white solid (27 mg, 90 %).  $^1\text{H}$  NMR ( $\text{CDCl}_3$ , 600 MHz)  $\delta$  (ppm): 7.82 (d,  $J = 3.6$  Hz, 1H), 7.62 (m, 1H), 7.54 (d,  $J = 7.4$  Hz, 1H), 7.47 (d,  $J = 6.9$  Hz, 1H), 4.47 (s, 2H).  $^{13}\text{C}$  NMR ( $\text{CDCl}_3$ , 600 MHz)  $\delta$  (ppm) : 200.5, 149.8, 138.7, 136.2, 130.8, 129.2, 126.7, 37.4. HRMS: calcd for  $[\text{M}+\text{H}]^+$  151.0212, found 151.0212.

### 3. Preparation of the test solution

All solutions of the anions were prepared from their sodium salts in deionized water. All solutions of the cations were prepared from their chloride salts in deionized water. NO was generated from SNP (Sodium Nitroferricyanide (III) dihydrate). SNP was added into degassed deionized water under Ar atmosphere then stirred for 30 min at

room temperature. Superoxide solution was prepared by adding  $\text{KO}_2$  (1 mg) to dry dimethyl sulfoxide (1 mL) and stirring vigorously for 10 min. The stock solution of probe **1** (2 mM) was prepared in  $\text{CH}_3\text{CN}$ , then diluted to 5  $\mu\text{M}$  for testing with the solution of PBS (20 mM, pH = 7.4, containing 20 mM CTAB). The stock solution of NaHS (20 mM) was prepared in deionized water, which was freshly prepared each time before use.

#### 4. Quantum Yields.

Fluorescence quantum yields of **1** and methylfluorescein **3** were determined in PBS buffer (10 mM, pH 7.4, containing 20 mM CTAB) with fluorescein ( $\Phi = 0.95$ , in 0.1 M NaOH) as a reference. Methylfluorescein **3** was obtained in the experiment by addition of 8 equiv of NaSH to the solution of probe **1**. The quantum yields were calculated using Eq.1:

$$\Phi_u = [(A_s FA_u \eta^2) / (A_u FA_s \eta_0^2)] \Phi_s. \quad \text{Eq.1}$$

Where  $A_s$  and  $A_u$  are the absorbance of the reference and sample solution at the reference excitation wavelength,  $FA_s$  and  $FA_u$  are the corresponding integrated fluorescence intensity, and  $\eta$  and  $\eta_0$  are the solvent refractive indexes of sample and reference, respectively. Absorbance of sample and reference at their respective excitation wavelengths was controlled to be lower than 0.05.

Quantum yield of **1**:  $\Phi = 0.0140$

Quantum yield of **3**:  $\Phi = 0.3786$

**5. Cell culture and fluorescence imaging:** The COS-7 cell line was provided by Institute of Biotechnology of Shanxi University. Cells were grown in [Dulbecco's Modified Eagle's medium \(DMEM\)](#) supplemented with 10 % FBS (Fetal Bovine Serum) and 1% antibiotics at 37 °C in humidified environment of 5%  $\text{CO}_2$ . Cells were plated on 6-well plate at  $5 \times 10^6$  cells per well and allowed to adhere for 12 hours. Before the experiments, cells were washed with PBS and then incubated with **1** (5  $\mu\text{M}$ ) in CMEM medium for 30 min at 37 °C and washed 3 times with PBS. Experiments to assess  $\text{H}_2\text{S}$  uptake were performed in the same media supplemented with 100  $\mu\text{M}$  NaHS for 30 min at 37 °C. Cell imaging was then carried out after washing cells with

PBS for 3 times. Fluorescence imaging was performed with by a DeltaVision Microscope.

## 6. Supplemental spectra

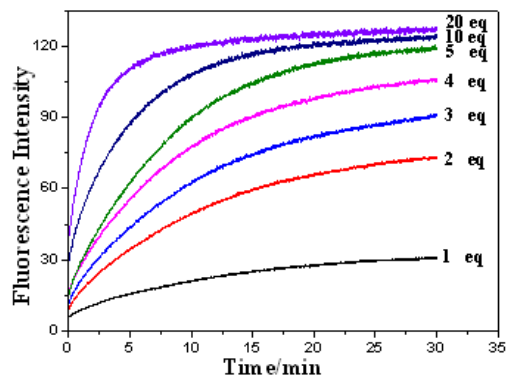

**Fig. S1** Time-dependent fluorescence intensity changes of **1** (5  $\mu$ M) upon addition of varied concentrations of NaHS in PBS buffer (10 mM, pH = 7.4, containing 20 mM CTAB).

## 7. $^1\text{H}$ NMR, $^{13}\text{C}$ NMR and HRMS chart of compounds **1** and **4**

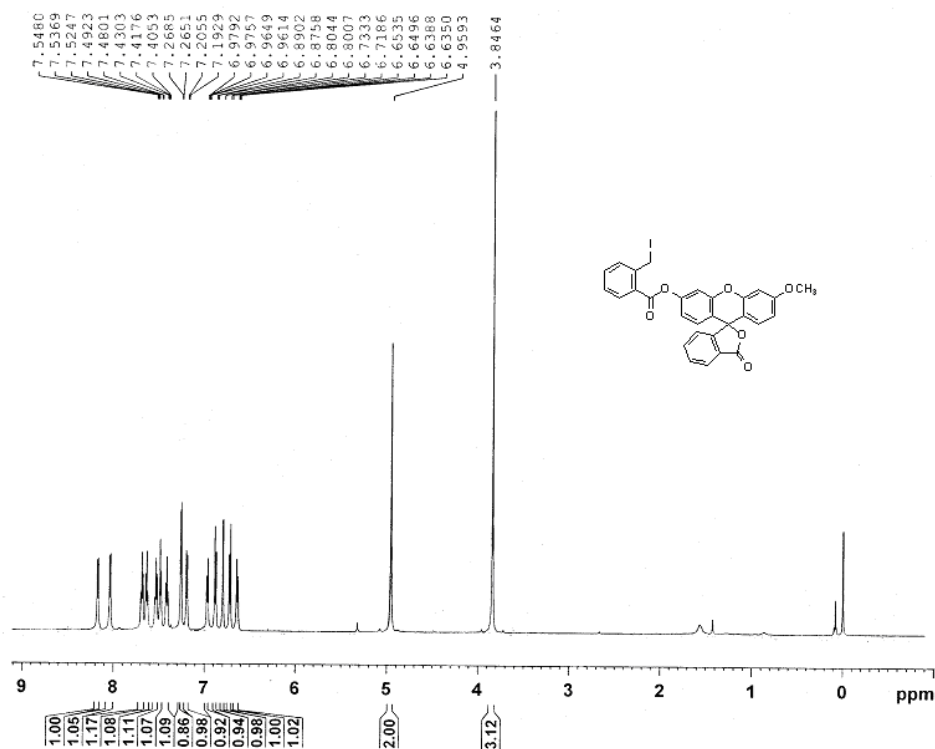

**Fig. S2.**  $^1\text{H}$  NMR chart of **1** ( $\text{CDCl}_3$ , 600 MHz).

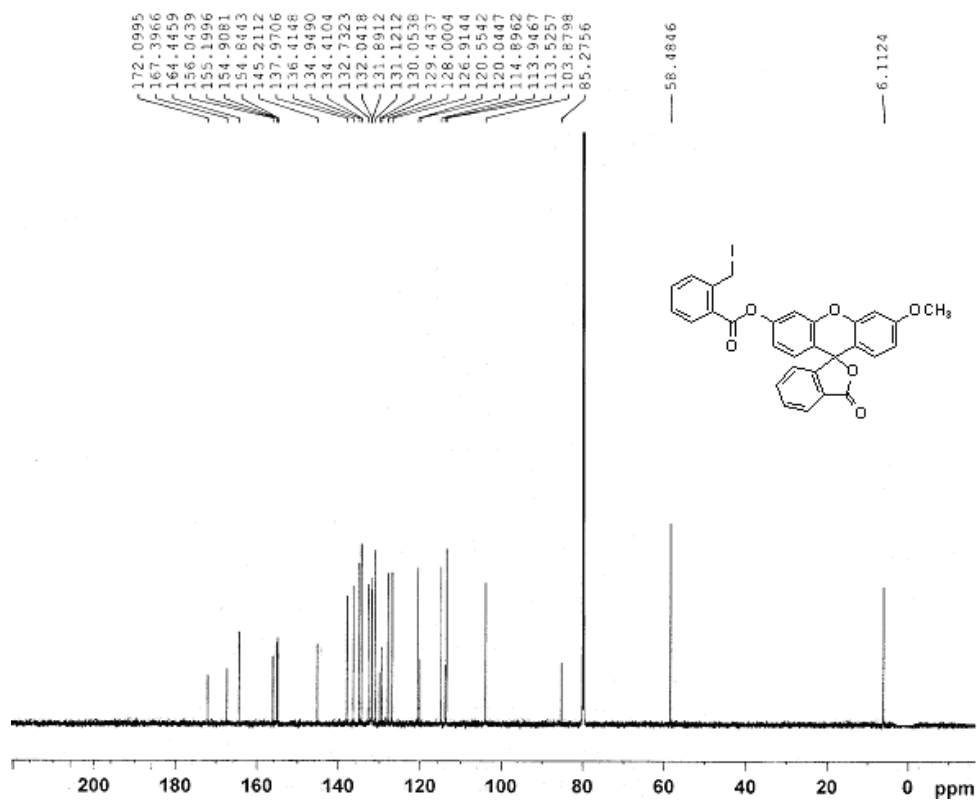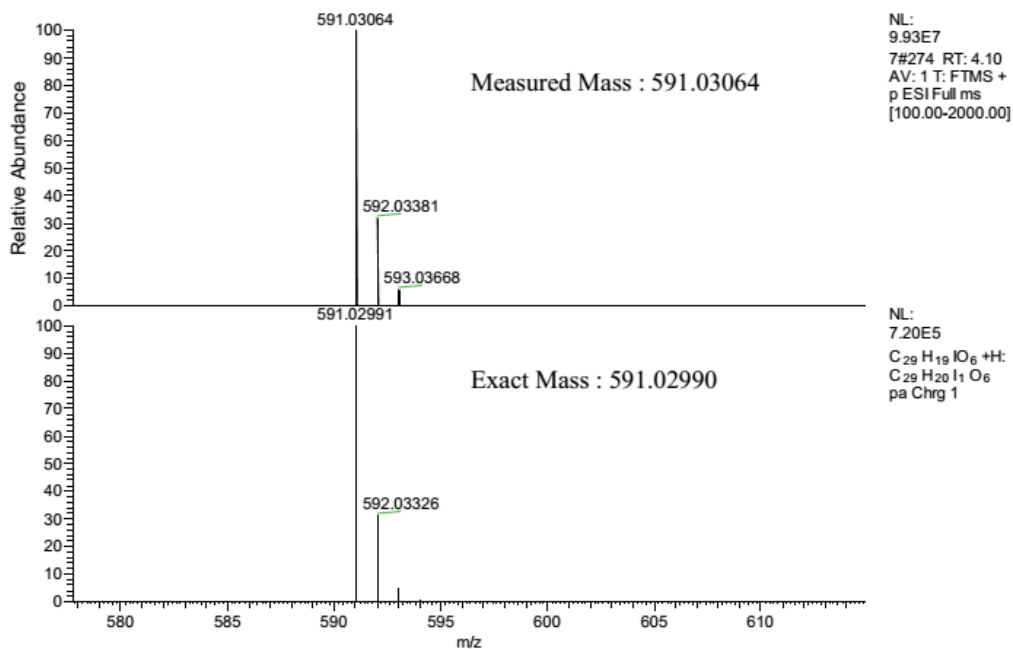

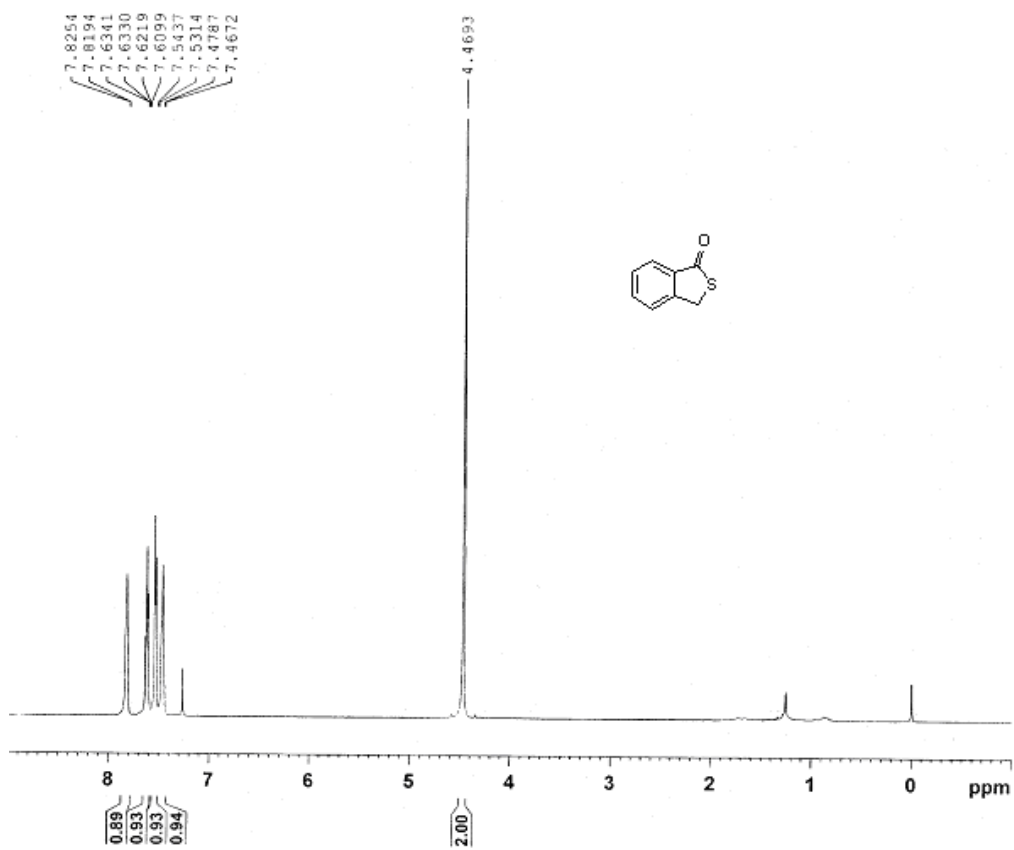

Fig. S5.  $^1\text{H}$  NMR chart of 4 ( $\text{CDCl}_3$ , 600 MHz).

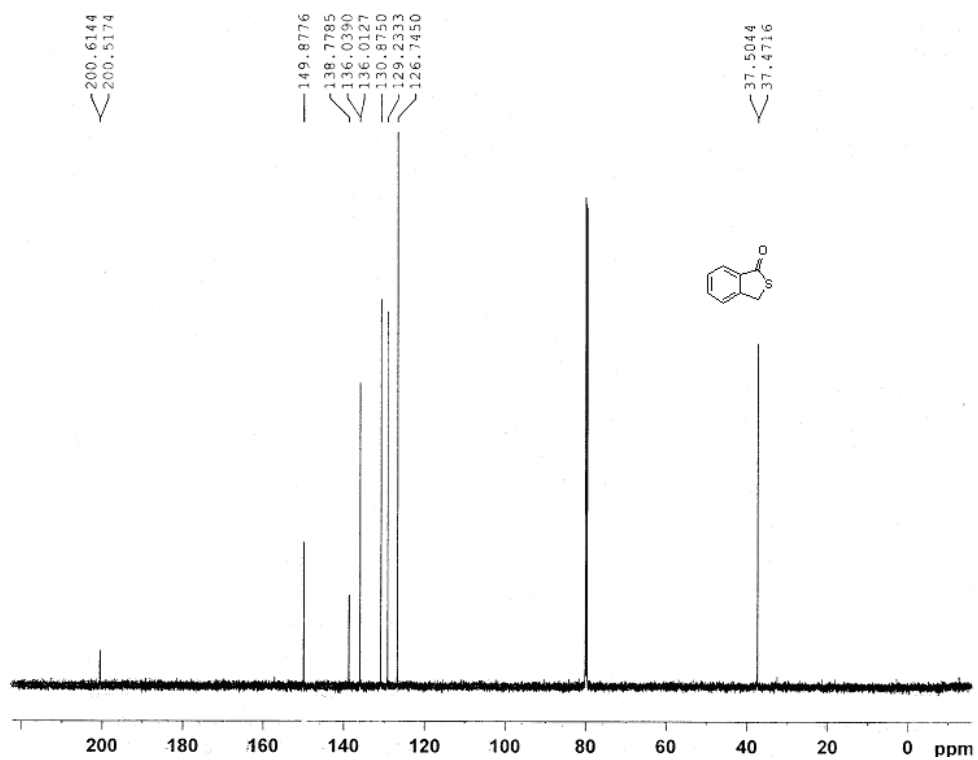

Fig. S6.  $^{13}\text{C}$  NMR chart of 4 ( $\text{CDCl}_3$ , 150 MHz).

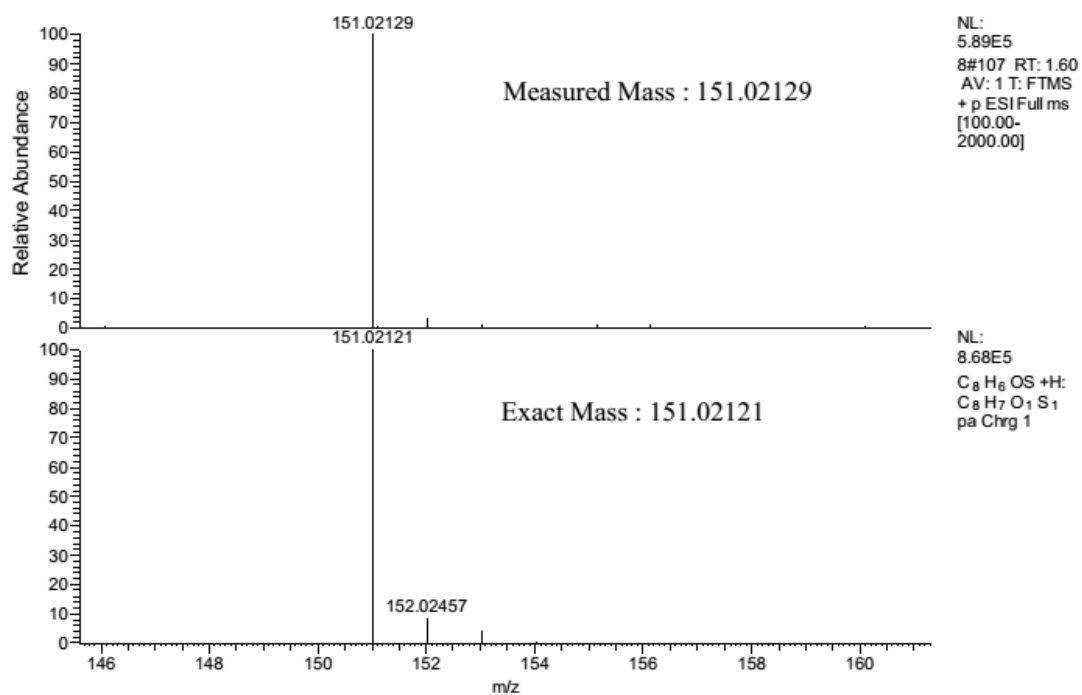

**Fig. S7.** HRMS chart of **4**.
